# Supplementary material for: Involvement of Three Esterase Genes from Panonychus citri (McGregor) in Fenpropathrin Resistance
Source: PubMed Central journal article supplement (PMC5000756; doi:10.3390/ijms17081361), 2016-08-19
Supplement: ijms-17-01361-s001.pdf [file ijms-17-01361-s001.pdf]

## Supplementary Material: Involvement of Three Esterase Genes from *Panonychus citri* (McGregor) in Fenpropathrin Resistance

Xiao-Min Shen, Chong-Yu Liao, Xue-Ping Lu, Zhe Wang, Jin-Jun Wang and Wei Dou

**Table S1.** Primers used for quantitative reverse transcription PCR (RT-qPCR) and double-stranded RNA (dsRNA) synthesis.

| Primer Names    |          | Sequence (5'–3')                            | Product Size (bp) |
|-----------------|----------|---------------------------------------------|-------------------|
| ORF Cloning     | PcE1-F   | <u>GGATCC</u> GATGATATTTAAGTTGCTAATATTTGTGC | 1653              |
|                 | PcE1-R   | <u>CTCGAG</u> TAAAGCTCTTCATGGTTATCGG        |                   |
|                 | PcE7-F   | <u>CCATGGG</u> GATGAATTTGGAAGAGTTTAAAATGT   | 1692              |
|                 | PcE7-R   | <u>CTGCAG</u> TTAGTTTTCTAGTGGAAATTGGT       |                   |
|                 | PcE9-F   | <u>GGATCC</u> GATGAAATTAACTTTTCTTTATTTGTG   | 2118              |
|                 | PcE9-R   | <u>CTCGAG</u> TTAGAAATAAACACGATACATTCTAG    |                   |
| RT-qPCR         | PcE1-qF  | GACGATGTTCCAATGATGT                         | 182               |
|                 | PcE1-qR  | ATTTCAACCTTCCAGATTC                         |                   |
|                 | PcE7-qF  | CCACTTATTTTCGCGATGGT                        | 165               |
|                 | PcE7-qR  | TGATGAACGCTGATCCATGT                        |                   |
|                 | PcE9-qF  | CCACCTTCAGGTCCAGTTGT                        | 199               |
|                 | PcE9-qR  | ACGCTGGTTTAGGTTTGGTG                        |                   |
| dsRNA Synthesis | PcE1-dsF | taatacactactatagggAGTGTCTTCGCCTCGGTAA       | 363               |
|                 | PcE1-dsR | taatacactactatagggGTGAGTTGGACAAGCGAGTG      |                   |
|                 | PcE7-dsF | taatacactactatagggTTCTCGATCCCAGTGCCATT      | 458               |
|                 | PcE7-dsR | taatacactactatagggTTACCACCCGAACCTTAGGCC     |                   |
|                 | PcE9-dsF | taatacactactatagggCATCGAACCAACCTCACGTG      | 483               |
|                 | PcE9-dsR | taatacactactatagggCGCTCCTTTAATGCCCAAGT      |                   |

ORF, open reading frame; The underlined regions are restriction enzyme sites. The lowercase letters represent the T7 promoter sequences for efficient in vitro transcription in dsRNA synthesis.
